# Supplementary material for: Low-temperature redox activity and alcohol ammoxidation performance on Cu- and Ru-incorporated ceria catalysts
Source: Royal Society of Chemistry journal article supplement (doi:10.1039/d4cp01432d), 2024-01-01
Supplement: d4cp01432d1.pdf [file d4cp01432d1.pdf]

Electronic Supporting Information

## **Low-temperature Redox Activity and Alcohol Ammoxidation Performance on Cu- and Ru-incorporated Ceria Catalysts**

Chaoqi Chen,<sup>a</sup> Satoru Ikemoto,<sup>a</sup> Gen-ichi Yokota,<sup>a</sup> Kimitaka Higuchi,<sup>b</sup> Satoshi Muratsugu,<sup>\*a,c</sup>  
and Mizuki Tada<sup>\*a,c,d</sup>

<sup>a</sup> Department of Chemistry, Graduate School of Science, Nagoya University, Furo-cho, Chikusa-ku, Nagoya, Aichi 464-8602, Japan

<sup>b</sup> Institute of Materials and Systems for Sustainability, Nagoya University. Furo-cho, Chikusa-ku, Nagoya, Aichi 464-8602, Japan

<sup>c</sup> Integrated Research Consortium on Chemical Sciences (IRCCS), Nagoya University, Furo-cho, Chikusa-ku, Nagoya, Aichi 464-8602, Japan

<sup>d</sup> Research Center for Materials Science (RCMS), Nagoya University, Furo-cho, Chikusa-ku, Nagoya, Aichi 464-8602, Japan

E-mail: muratsugu.satoshi.a5@f.mail.nagoya-u.ac.jp, tada.mizuki.u6@f.mail.nagoya-u.ac.jp

## Contents

| <b>General structural characterization</b> |                                                                                                                                                                                                                                                                                          |            |
|--------------------------------------------|------------------------------------------------------------------------------------------------------------------------------------------------------------------------------------------------------------------------------------------------------------------------------------------|------------|
| <b>Table S1</b>                            | Metal Compositions Estimated by ICP-OES Analysis and BET Surface Areas from N <sub>2</sub> Adsorption Analysis for As-prepared Cu <sub>0.18</sub> Ru <sub>0.05</sub> CeO <sub>z</sub> , Cu <sub>0.18</sub> CeO <sub>z</sub> , Ru <sub>0.04</sub> CeO <sub>z</sub> , and CeO <sub>z</sub> | <b>S5</b>  |
| <b>Fig. S1</b>                             | TEM images of as-prepared Cu <sub>0.18</sub> Ru <sub>0.05</sub> CeO <sub>z</sub> .                                                                                                                                                                                                       | <b>S5</b>  |
| <b>Table S2</b>                            | Ru Oxidation States of As-prepared Cu <sub>0.18</sub> Ru <sub>0.05</sub> CeO <sub>z</sub> estimated by Ru K-edge XANES Analysis and References                                                                                                                                           | <b>S6</b>  |
| <b>Fig. S2</b>                             | (a) Ru K-edge XANES spectra of standard samples and (b) calibration curve obtained from the energy at the 50% level of the Ru K-edge jump.                                                                                                                                               | <b>S6</b>  |
| <b>Table S3</b>                            | Ratio of Ce <sup>3+</sup> and Ce <sup>4+</sup> on As-prepared Cu <sub>0.18</sub> Ru <sub>0.05</sub> CeO <sub>z</sub> Calculated from Ce 3d XPS Spectrum                                                                                                                                  | <b>S7</b>  |
| <b>Fig. S3</b>                             | Calibration curve for Ce L <sub>III</sub> -edge XANES spectra for the oxidation state calculation of Ce in Cu <sub>0.18</sub> Ru <sub>0.05</sub> CeO <sub>z</sub> .                                                                                                                      | <b>S7</b>  |
| <b>Fig. S4</b>                             | O 1s XPS spectrum of as-prepared Cu <sub>0.18</sub> Ru <sub>0.05</sub> CeO <sub>z</sub> .                                                                                                                                                                                                | <b>S8</b>  |
| <b>Fig. S5</b>                             | (a) Cu K-edge EXAFS (a1) oscillation and (a2) Fourier transform for reference CuO. (b) Ru K-edge EXAFS (b1) oscillation and (b2) Fourier transform for reference RuO <sub>2</sub> .                                                                                                      | <b>S9</b>  |
| <b>Table S4</b>                            | Structural Parameters Obtained by the Curve-Fitting Analysis of Cu K-edge EXAFS Fourier Transform of Reference CuO                                                                                                                                                                       | <b>S10</b> |
| <b>Table S5</b>                            | Structural Parameters Obtained by the Curve-Fitting Analysis of Ru K-edge EXAFS Fourier Transform of Reference RuO <sub>2</sub>                                                                                                                                                          | <b>S10</b> |
| <b>Fig. S6</b>                             | (a) Cu K-edge EXAFS (a1) oscillation and (a2) Fourier transform for as-prepared Cu <sub>0.18</sub> Ru <sub>0.05</sub> CeO <sub>z</sub> . (b) Ru K-edge EXAFS (b1) oscillation and (b2) Fourier transform for as-prepared Cu <sub>0.18</sub> Ru <sub>0.05</sub> CeO <sub>z</sub> .        | <b>S11</b> |
| <b>Table S6</b>                            | Structural Parameters Obtained by the Curve-Fitting Analysis of Cu K-edge EXAFS Fourier Transform of As-prepared Cu <sub>0.18</sub> Ru <sub>0.05</sub> CeO <sub>z</sub>                                                                                                                  | <b>S12</b> |
| <b>Table S7</b>                            | Structural Parameters Obtained by Curve-Fitting Analysis of Ru K-edge EXAFS of As-prepared Cu <sub>0.18</sub> Ru <sub>0.05</sub> CeO <sub>z</sub>                                                                                                                                        | <b>S12</b> |
| <b>Redox performance evaluation</b>        |                                                                                                                                                                                                                                                                                          |            |
| <b>Table S8</b>                            | Results of TPR and TPO on Cu <sub>0.18</sub> Ru <sub>0.05</sub> CeO <sub>z</sub> , Cu <sub>0.18</sub> CeO <sub>z</sub> , and Ru <sub>0.04</sub> CeO <sub>z</sub>                                                                                                                         | <b>S13</b> |
| <b>Table S9</b>                            | Ru Oxidation States of Cu <sub>0.18</sub> Ru <sub>0.05</sub> CeO <sub>z</sub> After First H <sub>2</sub> Reduction, First O <sub>2</sub> Oxidation, and Second H <sub>2</sub> Reduction Estimated by <i>In Situ</i> Ru K-edge XANES Spectra                                              | <b>S14</b> |
| <b>Table S10</b>                           | Linear Combination Fitting of <i>In Situ</i> Cu K-edge XANES for Cu <sub>0.18</sub> Ru <sub>0.05</sub> CeO <sub>z</sub> After First H <sub>2</sub> Reduction, First O <sub>2</sub> Oxidation, and Second H <sub>2</sub> Reduction                                                        | <b>S14</b> |
| <b>Table S11</b>                           | Ce Oxidation States of Cu <sub>0.18</sub> Ru <sub>0.05</sub> CeO <sub>z</sub> After First H <sub>2</sub> Reduction, First O <sub>2</sub>                                                                                                                                                 | <b>S14</b> |

|                                                                                                                |                                                                                                                                                                                                                                                                                                                                                                                                                                                                                                    |            |
|----------------------------------------------------------------------------------------------------------------|----------------------------------------------------------------------------------------------------------------------------------------------------------------------------------------------------------------------------------------------------------------------------------------------------------------------------------------------------------------------------------------------------------------------------------------------------------------------------------------------------|------------|
|                                                                                                                | Oxidation, and Second H <sub>2</sub> Reduction Estimated by <i>In Situ</i> Ce L <sub>III</sub> -edge XANES Spectra                                                                                                                                                                                                                                                                                                                                                                                 |            |
| <b>Fig. S7</b>                                                                                                 | Cu K-edge <i>in situ</i> XANES spectra for Cu <sub>0.18</sub> Ru <sub>0.05</sub> CeO <sub>z</sub> . (a) After first H <sub>2</sub> reduction, (b) after first O <sub>2</sub> oxidation, and (c) after second H <sub>2</sub> reduction.                                                                                                                                                                                                                                                             | <b>S15</b> |
| <b>Table S12</b>                                                                                               | Calculated H <sub>2</sub> /O <sub>2</sub> Consumptions Corresponding to the Reduction/Oxidation of Metal Species in Cu <sub>0.18</sub> Ru <sub>0.05</sub> CeO <sub>z</sub> Estimated from the <i>In Situ</i> Cu K-edge, Ru K-edge, and Ce L <sub>III</sub> -edge XANES Spectral Changes                                                                                                                                                                                                            | <b>S16</b> |
| <b>Fig. S8</b>                                                                                                 | Cu K-edge EXAFS oscillations for Cu <sub>0.18</sub> Ru <sub>0.05</sub> CeO <sub>z</sub> . (a) After first H <sub>2</sub> reduction at 523 K, (b) after first O <sub>2</sub> oxidation at 573 K, (c) after third H <sub>2</sub> reduction at 523 K, and (d) after third O <sub>2</sub> oxidation at 573 K.                                                                                                                                                                                          | <b>S17</b> |
| <b>Fig. S9</b>                                                                                                 | (a) Ru K-edge EXAFS oscillations for Cu <sub>0.18</sub> Ru <sub>0.05</sub> CeO <sub>z</sub> . (a1) After first H <sub>2</sub> reduction at 523 K, (a2) after first O <sub>2</sub> oxidation at 573 K, (a3) after third H <sub>2</sub> reduction at 523 K, and (a4) after third O <sub>2</sub> oxidation at 573 K. (b) A Ru K-edge EXAFS oscillation for Ru powder.                                                                                                                                 | <b>S18</b> |
| <b>Table S13</b>                                                                                               | Structural Parameters Obtained by Curve-Fitting Analysis of Cu K-edge EXAFS Fourier Transforms for Cu <sub>0.18</sub> Ru <sub>0.05</sub> CeO <sub>z</sub> After the First and Third Redox Cycles                                                                                                                                                                                                                                                                                                   | <b>S19</b> |
|                                                                                                                |                                                                                                                                                                                                                                                                                                                                                                                                                                                                                                    |            |
| <b>Ammonoxidation of benzyl alcohol by using as Cu<sub>0.18</sub>Ru<sub>0.05</sub>CeO<sub>z</sub> catalyst</b> |                                                                                                                                                                                                                                                                                                                                                                                                                                                                                                    |            |
| <b>Fig. S10</b>                                                                                                | (a) Benzonitrile production rates for Cu <sub>0.18</sub> Ru <sub>0.05</sub> CeO <sub>z</sub> (red), Cu <sub>0.18</sub> CeO <sub>z</sub> (blue), Ru <sub>0.04</sub> CeO <sub>z</sub> (green), and a physical mixture of Cu <sub>0.18</sub> CeO <sub>z</sub> and Ru <sub>0.04</sub> CeO <sub>z</sub> (pink). (b) Initial reaction rate of Cu <sub>0.18</sub> Ru <sub>0.05</sub> CeO <sub>z</sub> (red), Cu <sub>0.18</sub> CeO <sub>z</sub> (blue), and Ru <sub>0.04</sub> CeO <sub>z</sub> (green). | <b>S20</b> |
| <b>Fig. S11</b>                                                                                                | Heterogeneity test for Cu <sub>0.18</sub> Ru <sub>0.05</sub> CeO <sub>z</sub> .                                                                                                                                                                                                                                                                                                                                                                                                                    | <b>S21</b> |
| <b>Fig. S12</b>                                                                                                | XRD patterns of Cu <sub>0.18</sub> Ru <sub>0.05</sub> CeO <sub>z</sub> before and after the ammonoxidation of benzyl alcohol for 24 h at 423 K.                                                                                                                                                                                                                                                                                                                                                    | <b>S22</b> |
| <b>Fig. S13</b>                                                                                                | HAADF-STEM images and EDS images of Cu <sub>0.18</sub> Ru <sub>0.05</sub> CeO <sub>z</sub> after the ammonoxidation of benzyl alcohol for 24 h at 423 K.                                                                                                                                                                                                                                                                                                                                           | <b>S23</b> |
| <b>Fig. S14</b>                                                                                                | (a) Cu K-edge, (b) Ru K-edge, and (c) Ce L <sub>III</sub> -edge XANES spectra of Cu <sub>0.18</sub> Ru <sub>0.05</sub> CeO <sub>z</sub> after the ammonoxidation of benzyl alcohol for 24 h at 423 K (with 0.32 MPa of NH <sub>3</sub> and 1.0 MPa of O <sub>2</sub> ).                                                                                                                                                                                                                            | <b>S24</b> |
| <b>Fig. S15</b>                                                                                                | (a) Cu K-edge EXAFS (a1) oscillations and (a2) Fourier transforms for Cu <sub>0.18</sub> Ru <sub>0.05</sub> CeO <sub>z</sub> after the ammonoxidation of benzyl alcohol for 24 h at 423 K. (b) Ru K-edge EXAFS (b1) oscillations and (b2) Fourier transforms for Cu <sub>0.18</sub> Ru <sub>0.05</sub> CeO <sub>z</sub> after the ammonoxidation of benzyl alcohol for 24 h at 423 K.                                                                                                              | <b>S25</b> |
| <b>Table S14</b>                                                                                               | Structural Parameters Obtained by the Curve-Fitting Analysis of Cu K-edge EXAFS Fourier Transform of Cu <sub>0.18</sub> Ru <sub>0.05</sub> CeO <sub>z</sub> After the Ammonoxidation of Benzyl Alcohol for 24 h at 423 K                                                                                                                                                                                                                                                                           | <b>S26</b> |
| <b>Table S15</b>                                                                                               | Structural Parameters Obtained by the Curve-Fitting Analysis of Ru K-edge EXAFS Fourier Transform of Cu <sub>0.18</sub> Ru <sub>0.05</sub> CeO <sub>z</sub> After the Ammonoxidation of Benzyl Alcohol for 24 h at 423 K                                                                                                                                                                                                                                                                           | <b>S26</b> |

|                                                    |                                                                                                                                                                                                                                                                                                            |            |
|----------------------------------------------------|------------------------------------------------------------------------------------------------------------------------------------------------------------------------------------------------------------------------------------------------------------------------------------------------------------|------------|
| <b>Fig. S16</b>                                    | (a) Cu K-edge, (b) Ru K-edge, and (c) Ce L <sub>III</sub> -edge XANES spectra of Cu <sub>0.18</sub> Ru <sub>0.05</sub> CeO <sub>z</sub> before and after the ammoxidation of benzyl alcohol under an inert atmosphere for 24 h at 423 K (with 0.32 MPa of NH <sub>3</sub> and 1.0 of MPa N <sub>2</sub> ). | <b>S27</b> |
| <b>Table S16</b>                                   | Catalytic Performance of Cu <sub>0.18</sub> Ru <sub>0.05</sub> CeO <sub>z</sub> and the Control Groups for the Selective Oxidation of Benzyl Alcohol                                                                                                                                                       | <b>S28</b> |
| <b>Table S17</b>                                   | Catalytic Performance of Cu <sub>0.18</sub> Ru <sub>0.05</sub> CeO <sub>z</sub> and the Control Groups for the Ammoxidation of Benzaldehyde                                                                                                                                                                | <b>S29</b> |
| <b>Scheme S1</b>                                   | Ammoxidation of benzyl alcohol and the roles of Cu and Ru species in each reaction step.                                                                                                                                                                                                                   | <b>S30</b> |
| <b>General setup condition for the experiments</b> |                                                                                                                                                                                                                                                                                                            |            |
| <b>Fig. S17</b>                                    | Setup for <i>in situ</i> QXAFS measurements for H <sub>2</sub> reduction and O <sub>2</sub> oxidation.                                                                                                                                                                                                     | <b>S31</b> |
| <b>References</b>                                  |                                                                                                                                                                                                                                                                                                            |            |
|                                                    |                                                                                                                                                                                                                                                                                                            | <b>S32</b> |

## Structural characterization of as-prepared $\text{Cu}_{0.18}\text{Ru}_{0.05}\text{CeO}_z$

**Table S1.** Metal Compositions Estimated by ICP-OES Analysis and BET Surface Areas for  $\text{N}_2$  Adsorption for As-prepared  $\text{Cu}_{0.18}\text{Ru}_{0.05}\text{CeO}_z$ ,  $\text{Cu}_{0.18}\text{CeO}_z$ ,  $\text{Ru}_{0.04}\text{CeO}_z$ , and  $\text{CeO}_z$

| Prepared oxide                                 | BET surface area / $\text{m}^2 \text{g}^{-1}$ | Molar ratio of Cu/Ru/Ce |
|------------------------------------------------|-----------------------------------------------|-------------------------|
| $\text{Cu}_{0.18}\text{Ru}_{0.05}\text{CeO}_z$ | $1.24 \times 10^2$                            | 0.178/0.05/1            |
| $\text{Cu}_{0.18}\text{CeO}_z$                 | $1.05 \times 10^2$                            | 0.0176/<0.002/1         |
| $\text{Ru}_{0.04}\text{CeO}_z$                 | $1.14 \times 10^2$                            | <0.0004/0.040/1         |
| $\text{CeO}_z$                                 | $1.20 \times 10^2$                            | -                       |

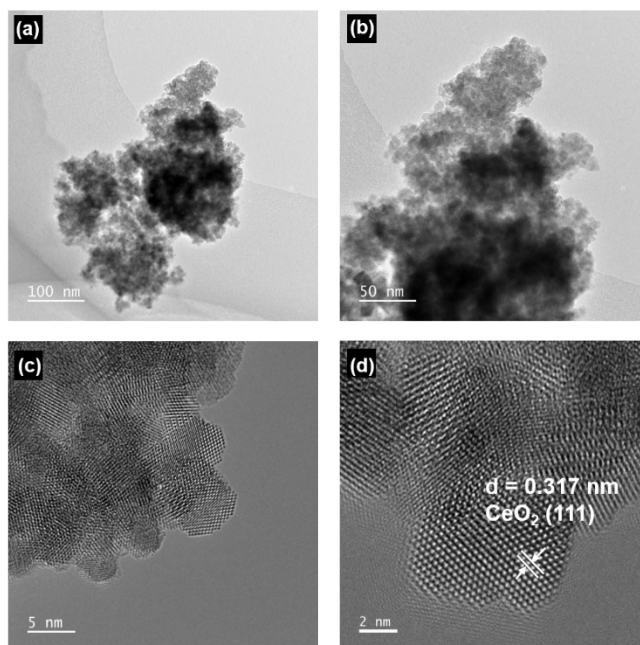

**Fig. S1.** TEM images of as-prepared  $\text{Cu}_{0.18}\text{Ru}_{0.05}\text{CeO}_z$ .

**Table S2.** Ru Oxidation States of As-prepared  $\text{Cu}_{0.18}\text{Ru}_{0.05}\text{CeO}_z$  Estimated by Ru K-edge XANES Analysis and References

| Ru sample                                                       | Energy /eV <sup>a</sup> | Oxidation state  |
|-----------------------------------------------------------------|-------------------------|------------------|
| Ru <sup>0</sup> powder                                          | 22116.0                 | 0                |
| Ru(acac) <sub>3</sub>                                           | 22120.6                 | 3                |
| RuO <sub>2</sub>                                                | 22121.3                 | 4                |
| KRuO <sub>4</sub>                                               | 22125.5                 | 7                |
| $\text{Cu}_{0.18}\text{Ru}_{0.05}\text{CeO}_z$<br>(as-prepared) | 22122.2                 | 4.5 <sup>b</sup> |

<sup>a</sup>The energy at the 50% level of the edge jump in the spectrum. <sup>b</sup>Calculated from the calibration curve in Fig. S2(b).

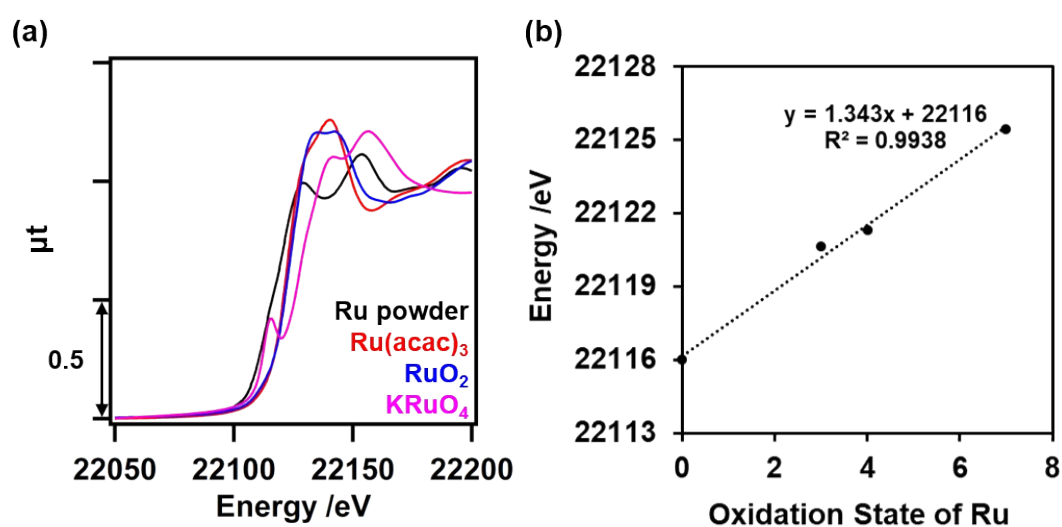

**Fig. S2.** (a) Ru K-edge XANES spectra of standard samples and (b) calibration curve obtained from the energy at the 50% level of the Ru K-edge jump.

**Table S3.** Ratio of Ce<sup>3+</sup> and Ce<sup>4+</sup> on As-prepared Cu<sub>0.18</sub>Ru<sub>0.05</sub>CeO<sub>z</sub> Calculated from the Ce 3d XPS Spectrum

| Sample                                                                  | Ratio of Ce <sup>3+</sup> | Ratio of Ce <sup>4+</sup> |
|-------------------------------------------------------------------------|---------------------------|---------------------------|
| Cu <sub>0.18</sub> Ru <sub>0.05</sub> CeO <sub>z</sub><br>(as-prepared) | 0.27                      | 0.73                      |

XPS spectra in Fig. 1(c3) in the main text were used for the calculation. The sum of the areas of  $u'$ ,  $u_0$ ,  $v'$ , and  $v_0$ , which were attributed to Ce<sup>3+</sup> (pink line in Fig. 1(c3)),<sup>1</sup> was calculated (area (A)). The sum of the areas of  $u''$ ,  $u''$ ,  $u_0$ ,  $v''$ ,  $v''$ , and  $v_0$ , which were attributed to Ce<sup>4+</sup> (black line in Fig. 1(c3))<sup>1,2</sup>, was calculated (area (B)). The ratio of Ce<sup>3+</sup> or Ce<sup>4+</sup> was calculated as (area (A) or area (B))/(area (A) + area (B)).

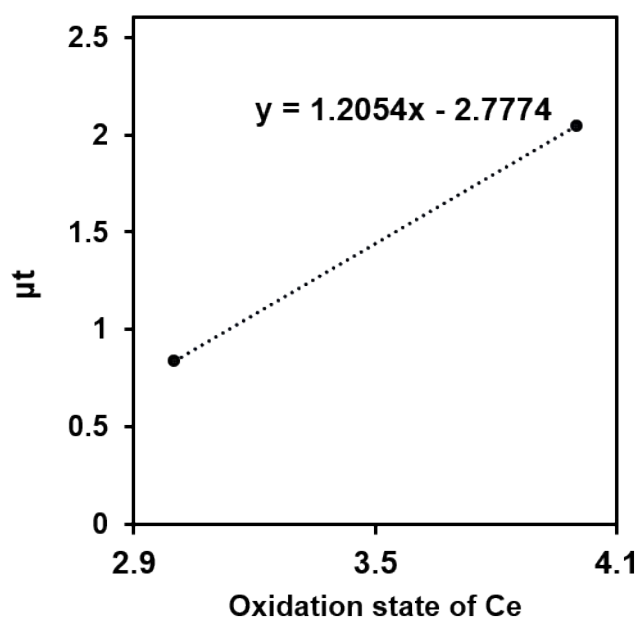

**Fig. S3.** Calibration curve for Ce L<sub>III</sub>-edge XANES spectra for the oxidation state calculation of Ce in Cu<sub>0.18</sub>Ru<sub>0.05</sub>CeO<sub>z</sub>. The intensity of the Ce L<sub>III</sub>-edge at 5741.3 eV (peak top of CeO<sub>2</sub>) was used for commercial CeO<sub>2</sub> and Ce<sub>2</sub>(CO<sub>3</sub>)<sub>3</sub> (Ce<sup>4+</sup> and Ce<sup>3+</sup> references, respectively).

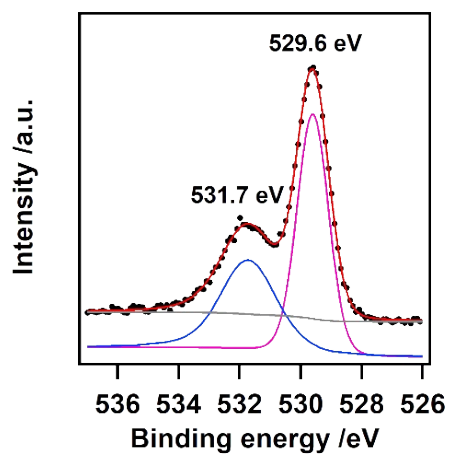

**Fig. S4.** O 1s XPS spectrum of as-prepared  $\text{Cu}_{0.18}\text{Ru}_{0.05}\text{CeO}_2$ . The peak at 529.6 eV was attributed to lattice oxygen of  $\text{CeO}_2$ <sup>3</sup> and that at 531.7 eV was attributed to hydroxyl groups<sup>4</sup> or oxygen vacancies from  $\text{Ce}^{3+}$  of  $\text{CeO}_2$ .<sup>5</sup>



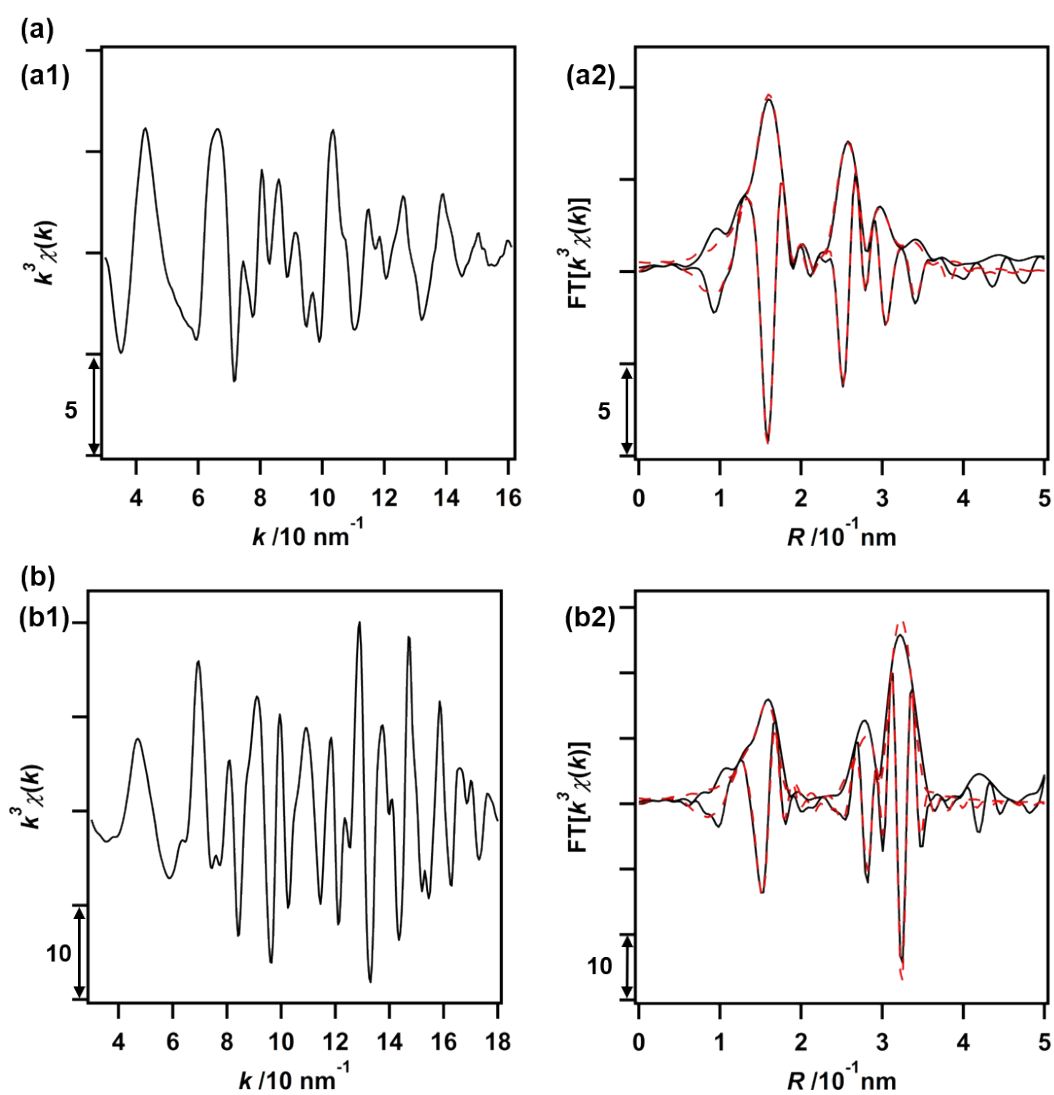

**Fig. S5.** (a) Cu K-edge EXAFS (a1) oscillation and (a2) Fourier transform for reference CuO ( $k = 30\text{--}160\text{ nm}^{-1}$ ). Black solid lines showed observed data and red dashed lines showed fitted data. (b) Ru K-edge EXAFS (b1) oscillation and (b2) Fourier transform for reference RuO<sub>2</sub> ( $k = 30\text{--}180\text{ nm}^{-1}$ ). Black solid lines showed observed data and red dashed lines showed fitted data.

**Table S4.** Structural Parameters Obtained by the Curve-Fitting Analysis of Cu K-edge EXAFS Fourier Transform (Measured at 298 K) of Reference CuO

| Path | Shell   | CN | $R$ /nm           | $\Delta E$ /eV | $\sigma^2/10^{-5}$ nm <sup>2</sup> | $R_f$ % |
|------|---------|----|-------------------|----------------|------------------------------------|---------|
| 1    | Cu-O    | 2  | $0.191 \pm 0.001$ | $4.2 \pm 0.8$  | $2 \pm 1$                          |         |
| 2    | Cu-O    | 2  | $0.200 \pm 0.001$ | $4.2 \pm 0.8$  | $2 \pm 1$                          |         |
| 3    | Cu-O    | 2  | $0.286 \pm 0.004$ | $4.2 \pm 0.8$  | $2 \pm 1$                          |         |
| 4    | Cu---Cu | 4  | $0.293 \pm 0.002$ | $5.6 \pm 2.3$  | $8 \pm 2$                          |         |
| 5    | Cu---Cu | 4  | $0.312 \pm 0.001$ | $5.6 \pm 2.3$  | $8 \pm 2$                          |         |
| 6    | Cu---Cu | 2  | $0.322 \pm 0.003$ | $5.6 \pm 2.3$  | $8 \pm 2$                          | 0.6     |
| 7    | Cu-O    | 2  | $0.334 \pm 0.007$ | $4.2 \pm 0.8$  | $2 \pm 1$                          |         |
| 8    | Cu---Cu | 2  | $0.340 \pm 0.003$ | $5.6 \pm 2.3$  | $8 \pm 2$                          |         |
| 9    | Cu-O    | 2  | $0.348 \pm 0.004$ | $4.2 \pm 0.8$  | $2 \pm 1$                          |         |
| 10   | Cu---Cu | 2  | $0.383 \pm 0.004$ | $5.6 \pm 2.3$  | $8 \pm 2$                          |         |
| 11   | Cu-O    | 2  | $0.395 \pm 0.005$ | $4.2 \pm 0.8$  | $2 \pm 1$                          |         |

$S_0^2$  was calculated to be  $0.70 \pm 0.05$ ,  $k = 30\text{--}160$  nm<sup>-1</sup>,  $R = 0.10\text{--}0.38$  nm. CNs of all shells were fixed.

**Table S5.** Structural Parameters Obtained by the Curve-Fitting Analysis of Ru K-edge EXAFS Fourier Transform (Measured at 298 K) of Reference RuO<sub>2</sub>

| Path | Shell   | CN | $R$ /nm           | $\Delta E$ /eV | $\sigma^2/10^{-5}$ nm <sup>2</sup> | $R_f$ % |
|------|---------|----|-------------------|----------------|------------------------------------|---------|
| 1    | Ru-O    | 6  | $0.197 \pm 0.001$ | $7.2 \pm 2.0$  | $3 \pm 1$                          |         |
| 2    | Ru---Ru | 2  | $0.312 \pm 0.001$ | $7.7 \pm 2.4$  | $3 \pm 1$                          |         |
| 3    | Ru-O    | 4  | $0.327 \pm 0.005$ | $7.2 \pm 2.0$  | $3 \pm 1$                          | 3.0     |
| 4    | Ru---Ru | 8  | $0.355 \pm 0.001$ | $7.7 \pm 2.4$  | $3 \pm 1$                          |         |
| 5    | Ru-O    | 4  | $0.374 \pm 0.007$ | $7.2 \pm 2.0$  | $3 \pm 1$                          |         |

$S_0^2$  was calculated to be  $0.86 \pm 0.13$ .  $k = 30\text{--}180$  nm<sup>-1</sup>,  $R = 0.10\text{--}0.38$  nm. CNs of all shells were fixed.

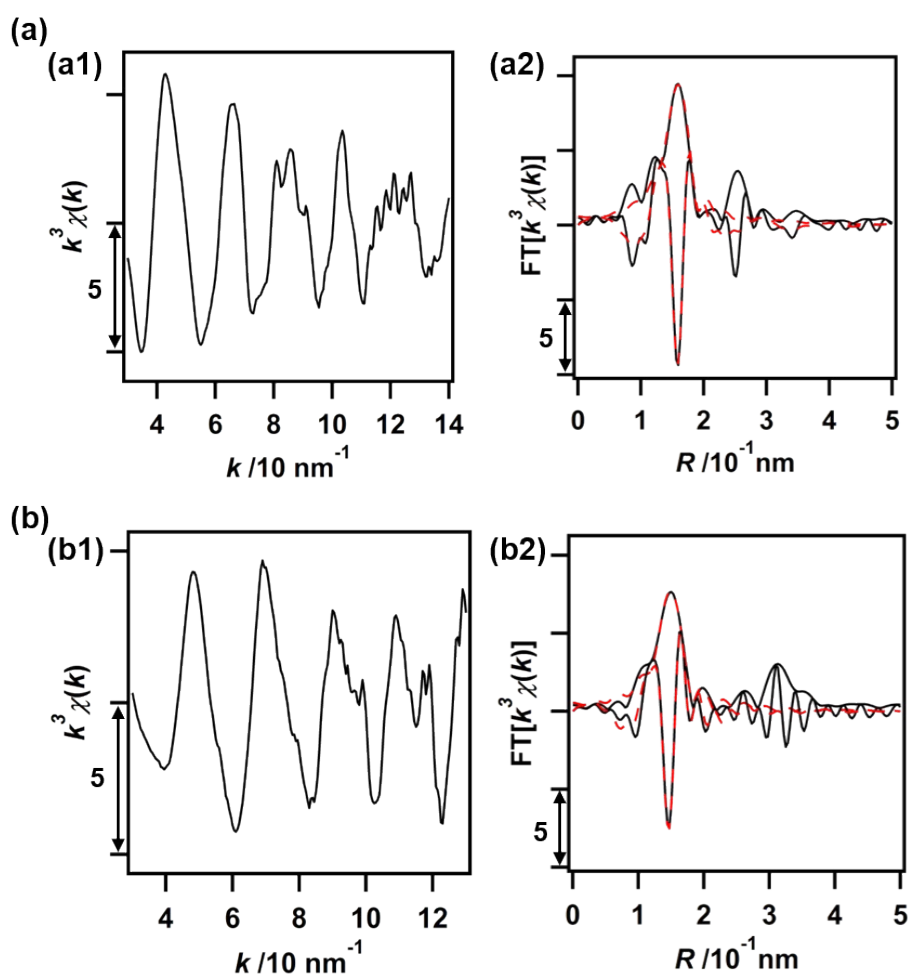

**Fig. S6.** (a) Cu K-edge EXAFS (a1) oscillation and (a2) Fourier transform for as-prepared  $\text{Cu}_{0.18}\text{Ru}_{0.05}\text{CeO}_z$  ( $k = 30\text{--}140 \text{ nm}^{-1}$ ). (b) Ru K-edge EXAFS (b1) oscillation and (b2) Fourier transform for as-prepared  $\text{Cu}_{0.18}\text{Ru}_{0.05}\text{CeO}_z$  ( $k = 30\text{--}130 \text{ nm}^{-1}$ ). (a2 and b2) Black solid lines showed observed data and red dashed lines showed fitted data.

**Table S6.** Structural Parameters Obtained by the Curve-Fitting Analysis of Cu K-edge EXAFS Fourier Transform (Measured at 298 K) of As-prepared  $\text{Cu}_{0.18}\text{Ru}_{0.05}\text{CeO}_z$

| Sample                                                          | Shell | CN               | $R$ /nm              | $\Delta E$ /eV | $\sigma^2 / 10^{-5} \text{ nm}^2$ | $R_f$ /% |
|-----------------------------------------------------------------|-------|------------------|----------------------|----------------|-----------------------------------|----------|
| $\text{Cu}_{0.18}\text{Ru}_{0.05}\text{CeO}_z$<br>(as-prepared) | Cu-O  | 4.6<br>$\pm 1.2$ | 0.196<br>$\pm 0.002$ | $4.5 \pm 3.5$  | $5 \pm 3$                         | 0.9      |

$S_0^2$  was fixed to be 0.70,  $k = 30\text{--}140 \text{ nm}^{-1}$ ,  $R = 0.12\text{--}0.19 \text{ nm}$ .

**Table S7.** Structural Parameters Obtained by the Curve-Fitting Analysis of Ru K-edge EXAFS Fourier Transform (Measured at 298 K) of As-prepared  $\text{Cu}_{0.18}\text{Ru}_{0.05}\text{CeO}_z$

| Sample                                                          | Shell | CN               | $R$ /nm              | $\Delta E$ /eV | $\sigma^2 / 10^{-5} \text{ nm}^2$ | $R_f$ /% |
|-----------------------------------------------------------------|-------|------------------|----------------------|----------------|-----------------------------------|----------|
| $\text{Cu}_{0.18}\text{Ru}_{0.05}\text{CeO}_z$<br>(as-prepared) | Ru-O  | 3.2<br>$\pm 1.0$ | 0.194<br>$\pm 0.002$ | $9.4 \pm 4.9$  | $3 \pm 2$                         | 0.2      |

$S_0^2$  was fixed as 0.86,  $k = 30\text{--}130 \text{ nm}^{-1}$ ,  $R = 0.12\text{--}0.19 \text{ nm}$ .

## Redox performance evaluation

**Table S8.** Results of TPR and TPO on  $\text{Cu}_{0.18}\text{Ru}_{0.05}\text{CeO}_z$ ,  $\text{Cu}_{0.18}\text{CeO}_z$ , and  $\text{Ru}_{0.04}\text{CeO}_z$

| Catalyst                                                     | Peak top of $\text{H}_2$ -TPR | $\text{H}_2$ consumption                    | $\text{O}_2$ consumption                    |
|--------------------------------------------------------------|-------------------------------|---------------------------------------------|---------------------------------------------|
|                                                              | /K                            | /mmol $\text{g}_{\text{cat}}^{-1}$<br>523 K | /mmol $\text{g}_{\text{cat}}^{-1}$<br>573 K |
| As-prepared $\text{Cu}_{0.18}\text{Ru}_{0.05}\text{CeO}_z$   | 353 and 363                   | 2.39                                        | 0.92                                        |
| Second TPR of $\text{Cu}_{0.18}\text{Ru}_{0.05}\text{CeO}_z$ | 333                           | 1.98                                        | 0.93                                        |
| Third TPR of $\text{Cu}_{0.18}\text{Ru}_{0.05}\text{CeO}_z$  | 317 – 331                     | 1.90                                        | 0.92                                        |
| Fourth TPR of $\text{Cu}_{0.18}\text{Ru}_{0.05}\text{CeO}_z$ | 315 – 331                     | 1.96                                        | 0.91                                        |
| <b>Control group I</b>                                       |                               |                                             |                                             |
| As-prepared $\text{Cu}_{0.18}\text{CeO}_z$                   | 415                           | 1.44                                        | 0.89                                        |
| Second TPR of $\text{Cu}_{0.18}\text{CeO}_z$                 | 409                           | 1.51                                        | 0.89                                        |
| Third TPR of $\text{Cu}_{0.18}\text{CeO}_z$                  | 361 and 389                   | 1.47                                        | 0.90                                        |
| Fourth TPR of $\text{Cu}_{0.18}\text{CeO}_z$                 | 361 and 389                   | 1.49                                        | 0.91                                        |
| As-prepared $\text{Ru}_{0.04}\text{CeO}_z$                   | 339                           | 1.60                                        | 0.88                                        |
| Second TPR of $\text{Ru}_{0.04}\text{CeO}_z$                 | 319                           | 1.36                                        | 0.87                                        |
| Third TPR of $\text{Ru}_{0.04}\text{CeO}_z$                  | 317                           | 1.26                                        | 0.87                                        |
| Fourth TPR of $\text{Ru}_{0.04}\text{CeO}_z$                 | 317                           | 1.27                                        | 0.87                                        |
| As-prepared $\text{CeO}_z$ <sup>2</sup>                      | 673                           | 0.51 (303–773 K)                            | -                                           |
| <b>Control group II</b>                                      |                               |                                             |                                             |
| CuO<br>(commercial product from Wako)                        | 477                           | 5.90 (303–773 K)                            | -                                           |
| $\text{RuO}_2$<br>(commercial product from Wako)             | 429                           | 5.67 (303–773 K)                            | -                                           |

Sample amounts: 200 mg (as-prepared  $\text{Cu}_{0.18}\text{Ru}_{0.05}\text{CeO}_z$  and control group I), 14.6 mg (CuO), and 7.1 mg ( $\text{RuO}_2$ ). The sample was treated with 27 kPa  $\text{H}_2$  and the temperature was increased at a rate of 5 K  $\text{min}^{-1}$  from 303 to 523 K, except for  $\text{CeO}_z$ , CuO, and  $\text{RuO}_2$  to 773 K. Then, the sample was treated with 27 kPa  $\text{O}_2$  from 303 to 573 K at a rate of 5 K  $\text{min}^{-1}$  and held at 573 K for 2 h. Once the entire system returned to 293 K, the second and subsequent rounds of TPR and TPO measurements were conducted by introducing 27 kPa  $\text{H}_2$  or  $\text{O}_2$  gas by a similar procedure. The change in the pressure was recorded at appropriate intervals.

**Table S9.** Ru Oxidation States of  $\text{Cu}_{0.18}\text{Ru}_{0.05}\text{CeO}_z$  After First  $\text{H}_2$  Reduction, First  $\text{O}_2$  Oxidation, and Second  $\text{H}_2$  Reduction Estimated by *In Situ* Ru K-edge XANES Spectra

| Standard Ru sample                                                                   | Energy /eV <sup>a</sup> | Ru oxidation state <sup>b</sup> |
|--------------------------------------------------------------------------------------|-------------------------|---------------------------------|
| $\text{Cu}_{0.18}\text{Ru}_{0.05}\text{CeO}_z$ (after first $\text{H}_2$ reduction)  | 22117.6                 | 1.06                            |
| $\text{Cu}_{0.18}\text{Ru}_{0.05}\text{CeO}_z$ (after first $\text{O}_2$ oxidation)  | 22122.1                 | 4.40                            |
| $\text{Cu}_{0.18}\text{Ru}_{0.05}\text{CeO}_z$ (after second $\text{H}_2$ reduction) | 22116.4                 | 0.19                            |

<sup>a</sup> Energy at the 50% level of the absorption edge jump. <sup>b</sup> Calculated from the calibration curve in Fig. S2(b).

**Table S10.** Linear Combination Fitting of *In Situ* Cu K-edge XANES for  $\text{Cu}_{0.18}\text{Ru}_{0.05}\text{CeO}_z$  After First  $\text{H}_2$  Reduction, First  $\text{O}_2$  Oxidation, and Second  $\text{H}_2$  Reduction

| Sample                                                                                  | Coefficient $c_1$ of CuO | Coefficient $c_2$ of $\text{Cu}_2\text{O}$ | Coefficient $c_3$ of Cu | Average oxidation states of Cu <sup>a</sup> |
|-----------------------------------------------------------------------------------------|--------------------------|--------------------------------------------|-------------------------|---------------------------------------------|
| $\text{Cu}_{0.18}\text{Ru}_{0.05}\text{CeO}_z$<br>(after first $\text{H}_2$ reduction)  | 0.00                     | 0.30                                       | 0.70                    | 0.30                                        |
| $\text{Cu}_{0.18}\text{Ru}_{0.05}\text{CeO}_z$<br>(after first $\text{O}_2$ oxidation)  | 1.00                     | 0.00                                       | 0.00                    | 2.00                                        |
| $\text{Cu}_{0.18}\text{Ru}_{0.05}\text{CeO}_z$<br>(after second $\text{H}_2$ reduction) | 0.00                     | 0.29                                       | 0.71                    | 0.29                                        |

Fitting equation: spectrum (sample) =  $c_1 \times$  spectrum (CuO) +  $c_2 \times$  spectrum ( $\text{Cu}_2\text{O}$ ) +  $c_3 \times$  spectrum (Cu foil). Energy range of the fitting: 8960.3–9010.3 eV.  $c_1 + c_2 + c_3$  was fixed as 1.

<sup>a</sup> Average oxidation state of Cu in the sample was calculated from the three coefficients ( $c_1$ ,  $c_2$ , and  $c_3$ ).

**Table S11.** Ce Oxidation States of  $\text{Cu}_{0.18}\text{Ru}_{0.05}\text{CeO}_z$  After First  $\text{H}_2$  Reduction, First  $\text{O}_2$  Oxidation, and Second  $\text{H}_2$  Reduction Estimated by *In Situ* Ce L<sub>III</sub>-edge XANES Spectra

| Sample                                                                               | Ce oxidation state <sup>a</sup> |
|--------------------------------------------------------------------------------------|---------------------------------|
| $\text{Cu}_{0.18}\text{Ru}_{0.05}\text{CeO}_z$ (after first $\text{H}_2$ reduction)  | 3.62                            |
| $\text{Cu}_{0.18}\text{Ru}_{0.05}\text{CeO}_z$ (after first $\text{O}_2$ oxidation)  | 3.83                            |
| $\text{Cu}_{0.18}\text{Ru}_{0.05}\text{CeO}_z$ (after second $\text{H}_2$ reduction) | 3.62                            |

<sup>a</sup> Calculated from the calibration curve in Fig. S3.

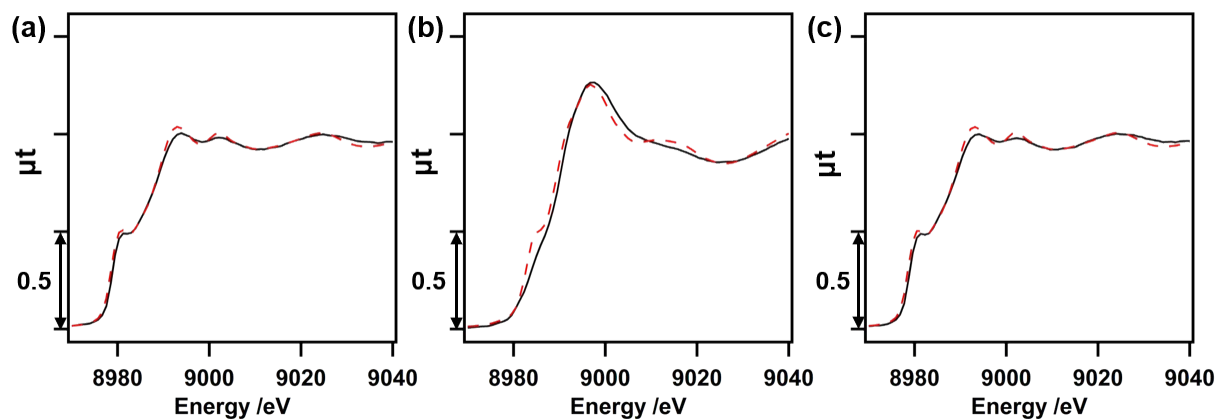

**Fig. S7.** Cu K-edge *in situ* XANES spectra for  $\text{Cu}_{0.18}\text{Ru}_{0.05}\text{CeO}_z$ . (a) After first  $\text{H}_2$  reduction, (b) after first  $\text{O}_2$  oxidation, and (c) after second  $\text{H}_2$  reduction. Black lines show the observed spectrum of  $\text{Cu}_{0.18}\text{Ru}_{0.05}\text{CeO}_z$  after  $\text{H}_2$  or  $\text{O}_2$  treatment. Red dashed lines show the LCF fitting spectrum of  $\text{Cu}_{0.18}\text{Ru}_{0.05}\text{CeO}_z$  after  $\text{H}_2$  or  $\text{O}_2$  treatment.

**Table S12.** Calculated H<sub>2</sub>/O<sub>2</sub> Consumptions Corresponding to the Reduction/Oxidation of Metal Species in Cu<sub>0.18</sub>Ru<sub>0.05</sub>CeO<sub>z</sub> Estimated from the *In Situ* Cu K-edge, Ru K-edge, and Ce L<sub>III</sub>-edge XANES Spectral Changes <sup>a</sup>

| Metal species | H <sub>2</sub> consumption in the first TPR /mmol g <sub>cat</sub> <sup>-1</sup> | O <sub>2</sub> consumption in the first TPO /mmol g <sub>cat</sub> <sup>-1</sup> | H <sub>2</sub> consumption in the second TPR /mmol g <sub>cat</sub> <sup>-1</sup> |
|---------------|----------------------------------------------------------------------------------|----------------------------------------------------------------------------------|-----------------------------------------------------------------------------------|
| Cu            | 0.78                                                                             | 0.39                                                                             | 0.79                                                                              |
| Ru            | 0.43                                                                             | 0.25                                                                             | 0.49                                                                              |
| Ce            | 0.60                                                                             | 0.21                                                                             | 0.57                                                                              |
| Total         | 1.81                                                                             | 0.85                                                                             | 1.85                                                                              |

<sup>a</sup> Changes in the oxidation states were estimated from the changes in the *in situ* XANES before and after the reduction or oxidation (Fig. 3). The valence changes were calculated as the H<sub>2</sub>/O<sub>2</sub> consumption on 1 g of Cu<sub>0.18</sub>Ru<sub>0.05</sub>CeO<sub>z</sub>. Finally, the sum of the consumed H<sub>2</sub>/O<sub>2</sub> was calculated as the total.



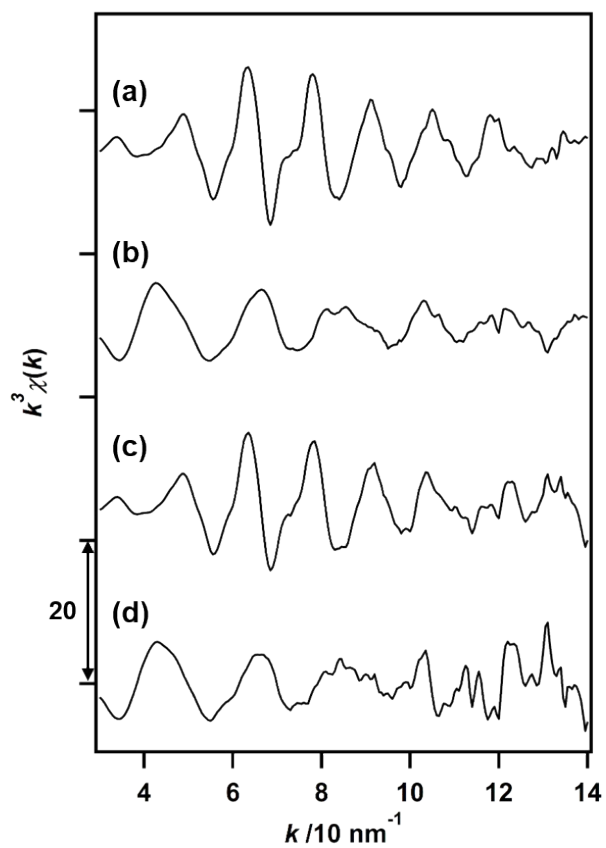

**Fig. S8.** Cu K-edge EXAFS oscillations for  $\text{Cu}_{0.18}\text{Ru}_{0.05}\text{CeO}_z$  ( $k = 30\text{--}140 \text{ nm}^{-1}$ ). (a) After first  $\text{H}_2$  reduction at 523 K, (b) after first  $\text{O}_2$  oxidation at 573 K, (c) after third  $\text{H}_2$  reduction at 523 K, and (d) after third  $\text{O}_2$  oxidation at 573 K.

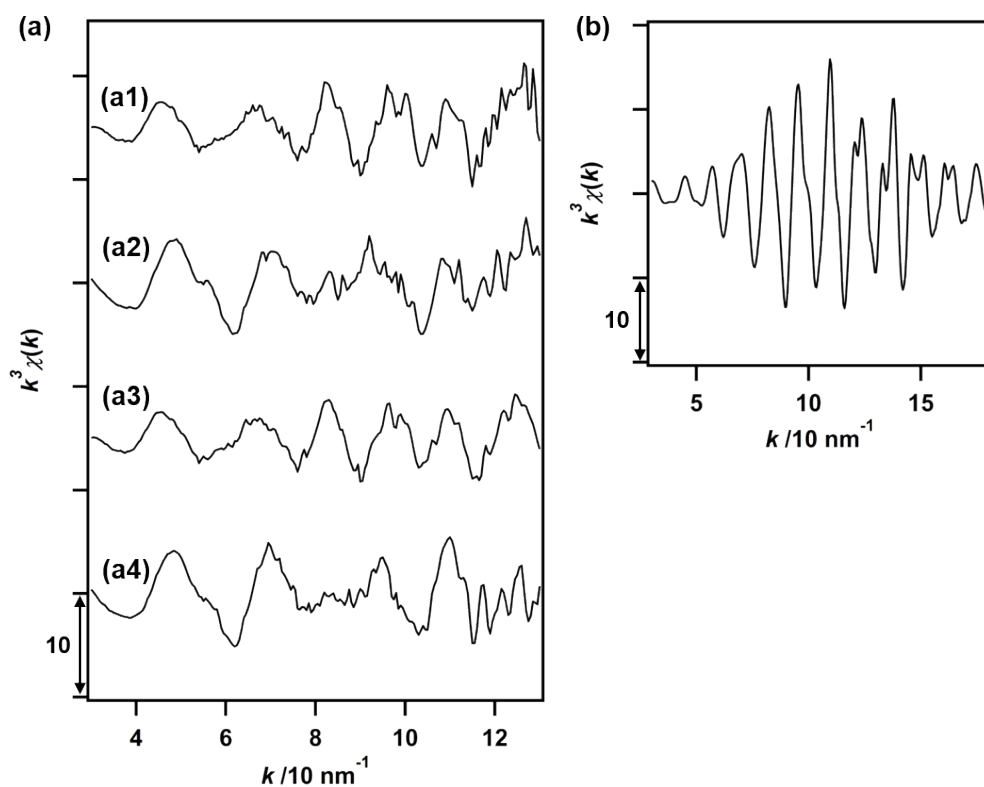

**Fig. S9.** (a) Ru K-edge EXAFS oscillations for  $\text{Cu}_{0.18}\text{Ru}_{0.05}\text{CeO}_z$  ( $k = 30\text{--}130 \text{ nm}^{-1}$ ). (a1) After first  $\text{H}_2$  reduction at 523 K, (a2) after first  $\text{O}_2$  oxidation at 573 K, (a3) after third  $\text{H}_2$  reduction at 523 K, and (a4) after third  $\text{O}_2$  oxidation at 573 K. (b) A Ru K-edge EXAFS oscillation for Ru powder ( $k = 30\text{--}180 \text{ nm}^{-1}$ ).

**Table S13.** Structural Parameters Obtained by Curve-Fitting Analysis of Cu K-edge EXAFS Fourier Transforms (Measured at 298 K) for  $\text{Cu}_{0.18}\text{Ru}_{0.05}\text{CeO}_z$  After the First and Third Redox Cycles

| Sample                                             | Shell | CN           | $R$ /nm          | $\Delta E$ /eV | $\sigma^2/10^{-5}$<br>nm <sup>2</sup> | $R_f$ /% |
|----------------------------------------------------|-------|--------------|------------------|----------------|---------------------------------------|----------|
| (a1) After first H <sub>2</sub> reduction at 523 K | Cu-Cu | 6.1<br>± 0.9 | 0.253<br>± 0.001 | -0.1<br>± 1.4  | 10<br>± 1                             | 0.5      |
| (a2) After first O <sub>2</sub> oxidation at 573 K | Cu-O  | 4.7<br>± 0.8 | 0.196<br>± 0.002 | 3.9<br>± 3.8   | 5<br>± 2                              | 2.0      |
| (a3) After third H <sub>2</sub> reduction at 523 K | Cu-Cu | 6.9<br>± 1.0 | 0.252<br>± 0.001 | -0.9<br>± 2.0  | 12<br>± 1                             | 0.8      |
| (a4) After third O <sub>2</sub> oxidation at 573 K | Cu-O  | 5.7<br>± 2.7 | 0.195<br>± 0.004 | 2.5<br>± 6.7   | 8<br>± 5                              | 3.9      |

$S_0^2$  was fixed as 1 for metallic Cu and 0.70 for  $\text{Cu}^{2+}$  oxide.  $k = 30\text{--}140 \text{ nm}^{-1}$ ,  $R = 0.18\text{--}0.27 \text{ nm}$  (a1),  $0.12\text{--}0.19 \text{ nm}$  (a2),  $0.18\text{--}0.27 \text{ nm}$  (a3), and  $0.12\text{--}0.19 \text{ nm}$  (a4).

## Amoxidation performance of $\text{Cu}_{0.18}\text{Ru}_{0.05}\text{CeO}_z$

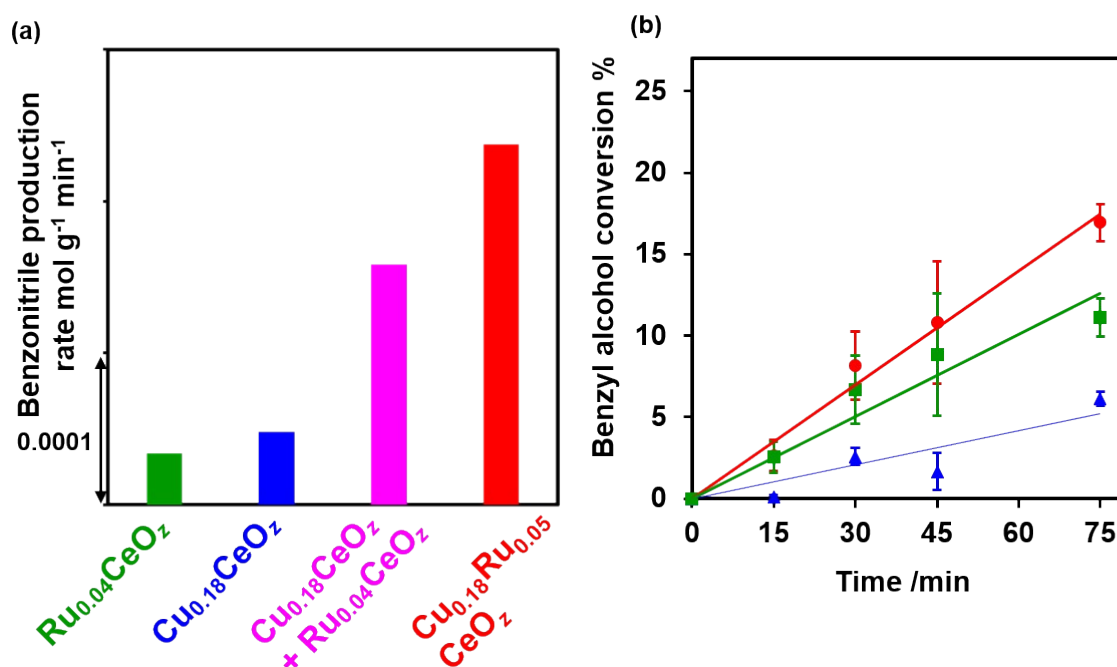

**Fig. S10.** (a) Benzonitrile production rates for  $\text{Cu}_{0.18}\text{Ru}_{0.05}\text{CeO}_z$  (red),  $\text{Cu}_{0.18}\text{CeO}_z$  (blue),  $\text{Ru}_{0.04}\text{CeO}_z$  (green), and a physical mixture of  $\text{Cu}_{0.18}\text{CeO}_z$  and  $\text{Ru}_{0.04}\text{CeO}_z$  (pink). (b) Initial reaction rate of  $\text{Cu}_{0.18}\text{Ru}_{0.05}\text{CeO}_z$  (red),  $\text{Cu}_{0.18}\text{CeO}_z$  (blue), and  $\text{Ru}_{0.04}\text{CeO}_z$  (green). The reaction was carried out by using four different autoclaves at 423 K and stopped at 15, 30, 45, and 75 min. Each reaction was performed three times to obtain the error bars.  $\text{Cu}_{0.18}\text{CeO}_z + \text{Ru}_{0.04}\text{CeO}_z$  was obtained by physically mixing the two catalysts together.

Benzonitrile production rates were calculated by (amount of benzonitrile produced, mmol)/(catalyst weight, g)/(reaction time, min).

Reaction conditions: Benzyl alcohol (1.93 mmol), toluene (1.0 mL), dodecane (internal standard; 0.07 mL),  $\text{NH}_3$  (0.32 MPa),  $\text{O}_2$  (1.0 MPa), 423 K. Mass balance was over 0.9 at this experiment.  $\text{Cu}_{0.18}\text{Ru}_{0.05}\text{CeO}_z$  (14.7 mg), Ru/Cu/alcohol/dodecane = 1/3.5/500/500.  $\text{Cu}_{0.18}\text{CeO}_z$  (14.3 mg), Cu/alcohol/dodecane = 1/150/150.  $\text{Ru}_{0.04}\text{CeO}_z$  (15.3 mg), Ru/alcohol/dodecane = 1/500/500.

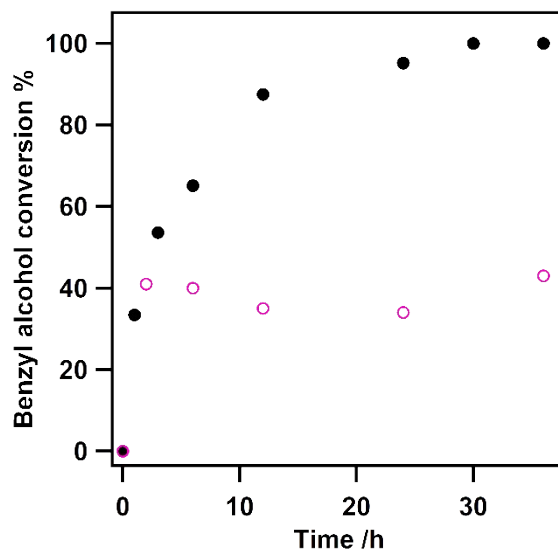

**Fig. S11.** Heterogeneity test for  $\text{Cu}_{0.18}\text{Ru}_{0.05}\text{CeO}_z$ . Black dots: Time-conversion plot of  $\text{Cu}_{0.18}\text{Ru}_{0.05}\text{CeO}_z$ . Pink dots: amoxidation of benzyl alcohol after filtering and removing  $\text{Cu}_{0.18}\text{Ru}_{0.05}\text{CeO}_z$  from the reaction. The benzyl alcohol conversion in the heterogeneity test was measured at 2, 6, 12, 24, and 36 h.

Reaction conditions: Benzyl alcohol (1.93 mmol), toluene (1.0 mL), dodecane (internal standard; 0.07 mL), 423 K. Mass balance was over 0.9.  $\text{Cu}_{0.18}\text{Ru}_{0.05}\text{CeO}_z$  (74 mg), Ru/Cu/benzyl alcohol/ $\text{NH}_3$ /dodecane = 1/3.5/100/191/100.

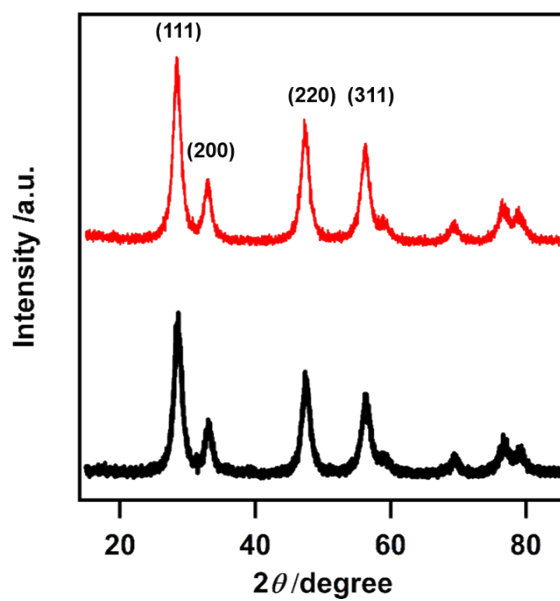

**Fig. S12.** XRD patterns of  $\text{Cu}_{0.18}\text{Ru}_{0.05}\text{CeO}_z$  before and after the ammoxidation of benzyl alcohol for 24 h at 423 K. Black line:  $\text{Cu}_{0.18}\text{Ru}_{0.05}\text{CeO}_z$  before the reaction. Red line:  $\text{Cu}_{0.18}\text{Ru}_{0.05}\text{CeO}_z$  after the reaction.

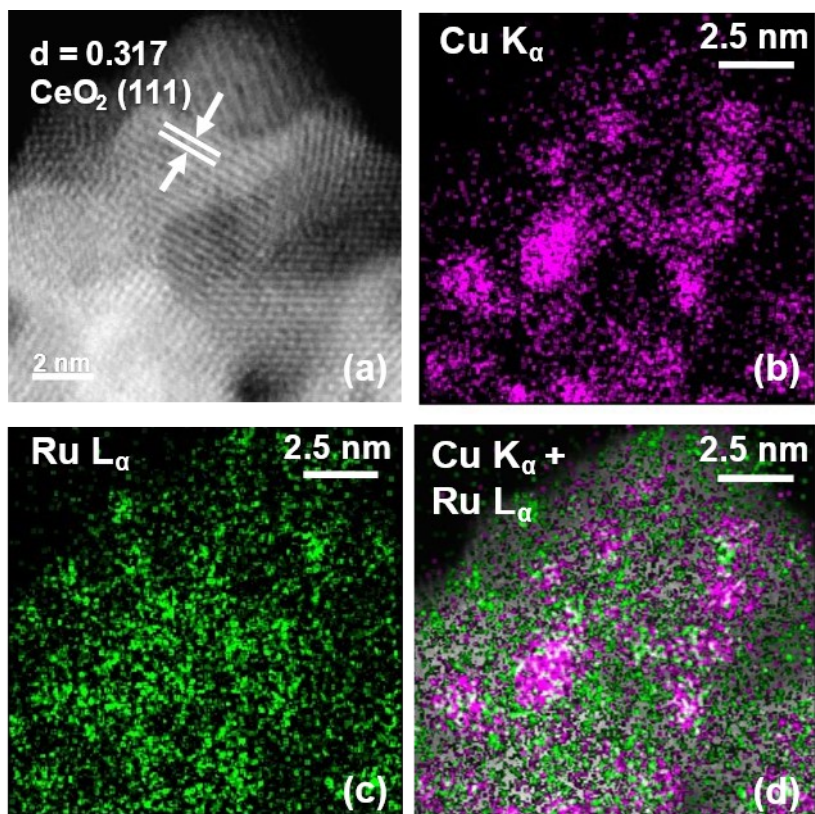

**Fig. S13.** (a) HAADF-STEM images of  $\text{Cu}_{0.18}\text{Ru}_{0.05}\text{CeO}_2$  after the ammoxidation of benzyl alcohol for 24 h at 423 K, and (b) EDS map of Cu, (c) EDS map of Ru, and (d) overlapped EDS maps of Cu and Ru.

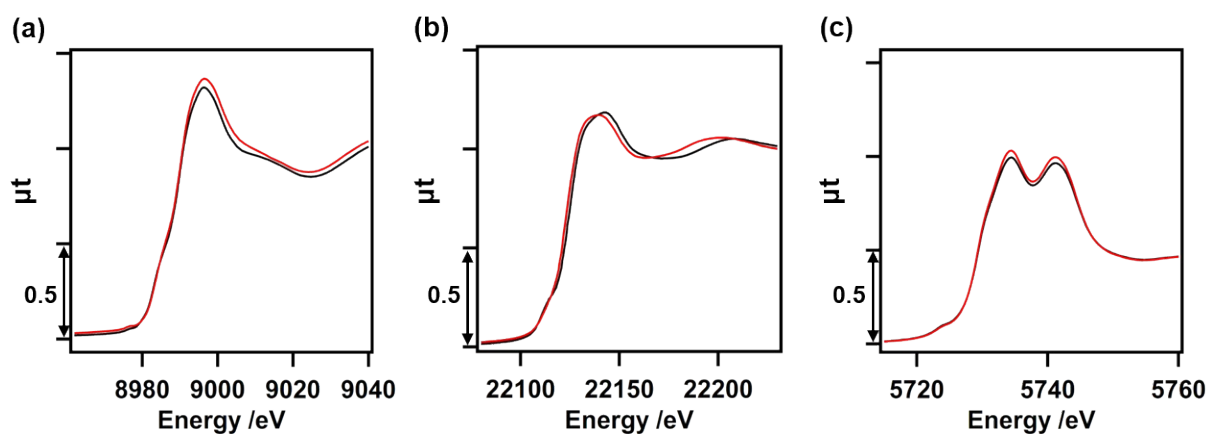

**Fig. S14.** (a) Cu K-edge, (b) Ru K-edge, and (c) Ce L<sub>III</sub> edge XANES spectra of Cu<sub>0.18</sub>Ru<sub>0.05</sub>CeO<sub>2</sub> after the ammoxidation of benzyl alcohol for 24 h at 423 K (with 0.32 MPa of NH<sub>3</sub> and 1.0 MPa of O<sub>2</sub>). Black lines: XANES spectra of as-prepared Cu<sub>0.18</sub>Ru<sub>0.05</sub>CeO<sub>2</sub> before the reaction. Red lines: XANES spectra of Cu<sub>0.18</sub>Ru<sub>0.05</sub>CeO<sub>2</sub> after the ammoxidation of benzyl alcohol for 24 h at 423 K.



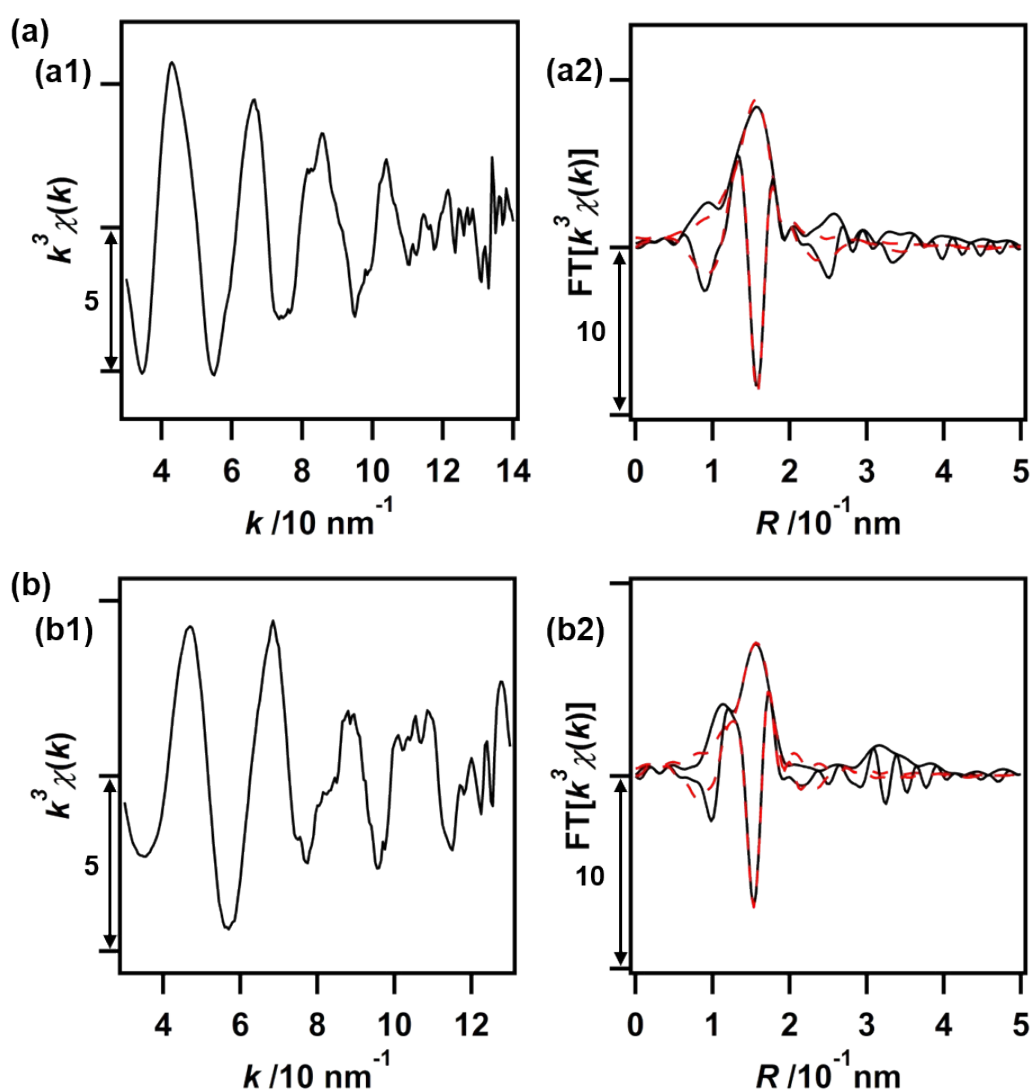

**Fig. S15.** (a) Cu K-edge EXAFS (a1) oscillations and (a2) Fourier transforms of  $\text{Cu}_{0.18}\text{Ru}_{0.05}\text{CeO}_z$  after the ammoxidation of benzyl alcohol for 24 h at 423 K ( $k = 30\text{--}140 \text{ nm}^{-1}$ ). (b) Ru K-edge EXAFS (b1) oscillations and (b2) Fourier transforms of  $\text{Cu}_{0.18}\text{Ru}_{0.05}\text{CeO}_z$  after the ammoxidation of benzyl alcohol for 24 h at 423 K ( $k = 30\text{--}130 \text{ nm}^{-1}$ ). In (a2) and (b2), black solid lines show the observed data and red dashed lines show the fitted data.

**Table S14.** Structural Parameters Obtained by the Curve-Fitting Analysis of Cu K-edge EXAFS Fourier Transform (Measured at 298 K) of  $\text{Cu}_{0.18}\text{Ru}_{0.05}\text{CeO}_z$  After the Ammoxidation of Benzyl Alcohol for 24 h at 423 K

| Sample                                                           | Shell | CN               | $R/\text{nm}$        | $\Delta E/\text{eV}$ | $\sigma^2/10^{-5}\text{ nm}^2$ | $R_f\%$ |
|------------------------------------------------------------------|-------|------------------|----------------------|----------------------|--------------------------------|---------|
| $\text{Cu}_{0.18}\text{Ru}_{0.05}\text{CeO}_z$<br>after reaction | Cu-O  | 5.5<br>$\pm 1.2$ | 0.194<br>$\pm 0.002$ | 2.0<br>$\pm 3.3$     | 7<br>$\pm 2$                   | 0.6     |

$S_0^2$  was fixed as 0.70,  $k = 30\text{--}140\text{ nm}^{-1}$ ,  $R = 0.12\text{--}0.19\text{ nm}$ .

**Table S15.** Structural Parameters Obtained by the Curve-Fitting Analysis of Ru K-edge EXAFS Fourier Transform (Measured at 298 K) of  $\text{Cu}_{0.18}\text{Ru}_{0.05}\text{CeO}_z$  After the Ammoxidation of Benzyl Alcohol for 24 h at 423 K

| Sample                                                           | Shell | CN               | $R/\text{nm}$        | $\Delta E/\text{eV}$ | $\sigma^2/10^{-5}\text{ nm}^2$ | $R_f\%$ |
|------------------------------------------------------------------|-------|------------------|----------------------|----------------------|--------------------------------|---------|
| $\text{Cu}_{0.18}\text{Ru}_{0.05}\text{CeO}_z$<br>after reaction | Ru-O  | 4.2<br>$\pm 1.5$ | 0.203<br>$\pm 0.003$ | 11<br>$\pm 5.4$      | 6<br>$\pm 3$                   | 0.3     |

$S_0^2$  was fixed as 0.86,  $k = 30\text{--}130\text{ nm}^{-1}$ ,  $R = 0.12\text{--}0.19\text{ nm}$ .

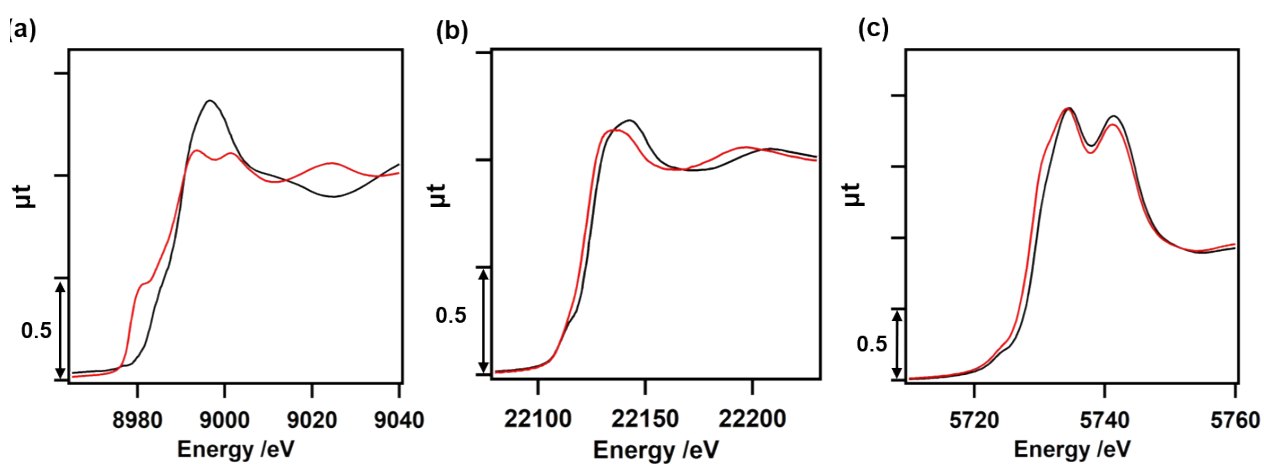

**Fig. S16.** (a) Cu K-edge, (b) Ru K-edge, and (c) Ce L<sub>III</sub>-edge XANES spectra of  $\text{Cu}_{0.18}\text{Ru}_{0.05}\text{CeO}_z$  before (black) and after (red) the ammoxidation of benzyl alcohol under an inert atmosphere for 24 h at 423 K (with 0.32 MPa of  $\text{NH}_3$  and 1.0 MPa of  $\text{N}_2$ ).

**Table S16.** Catalytic Performance of  $\text{Cu}_{0.18}\text{Ru}_{0.05}\text{CeO}_z$  and the Control Groups for the Selective Oxidation of Benzyl Alcohol

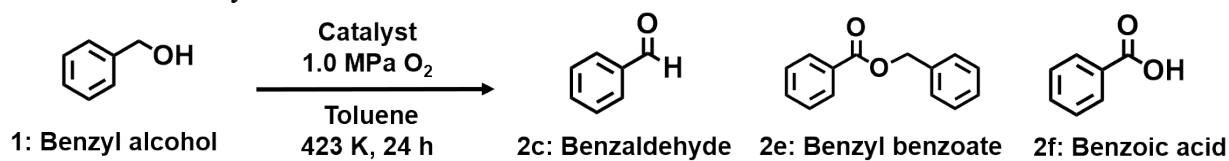

| Entry          | Catalyst                                       | Conversion of <b>1</b> % | Selectivity of <b>2c</b> % | Selectivity of <b>2e</b> % | Selectivity of <b>2f</b> % |
|----------------|------------------------------------------------|--------------------------|----------------------------|----------------------------|----------------------------|
| 1 <sup>a</sup> | $\text{Cu}_{0.18}\text{Ru}_{0.05}\text{CeO}_z$ | >99                      | 5                          | 14                         | 78                         |
| 2 <sup>b</sup> | $\text{Cu}_{0.18}\text{CeO}_z$                 | 30                       | 81                         | 38                         | 0                          |
| 3 <sup>c</sup> | $\text{Ru}_{0.04}\text{CeO}_z$                 | >99                      | 7                          | 14                         | 83                         |
| 4 <sup>d</sup> | $\text{CeO}_z$                                 | 26                       | 80                         | 0                          | 0                          |
| 5              | Blank                                          | 0                        | 0                          | 0                          | 0                          |

Reaction conditions: **1** (1.93 mmol), toluene (1.0 mL), dodecane (0.07 mL),  $\text{O}_2$  (1.0 MPa), 423 K, 24 h. Mass balance was over 0.9. <sup>a</sup> $\text{Cu}_{0.18}\text{Ru}_{0.05}\text{CeO}_z$  (74 mg), Ru/Cu/1/dodecane = 1/3.5/100/100. <sup>b</sup> $\text{Cu}_{0.18}\text{CeO}_z$  (77 mg), Cu/1/dodecane = 1/29/29. <sup>c</sup> $\text{Ru}_{0.04}\text{CeO}_z$  (72 mg), Ru/1/dodecane = 1/100/100. <sup>d</sup> $\text{CeO}_z$  (74 mg), 1/dodecane = 1/1.

**Table S17.** Catalytic Performance of  $\text{Cu}_{0.18}\text{Ru}_{0.05}\text{CeO}_z$  and the Control Groups for the Ammoxidation of Benzaldehyde

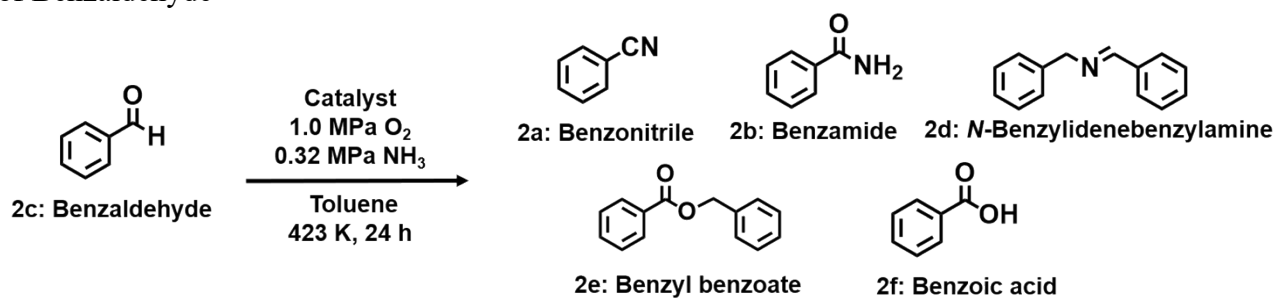

| Entry          | Catalyst                                       | Conversion of <b>2c</b> % | Select. of <b>2a</b> % | Select. of <b>2b</b> % | Select. of <b>2d</b> % | Select. of <b>2e</b> % | Select. of <b>2f</b> % |
|----------------|------------------------------------------------|---------------------------|------------------------|------------------------|------------------------|------------------------|------------------------|
| 1 <sup>a</sup> | $\text{Cu}_{0.18}\text{Ru}_{0.05}\text{CeO}_z$ | >99                       | 91                     | 9                      | 0                      | 0                      | 0                      |
| 2 <sup>b</sup> | $\text{Cu}_{0.18}\text{CeO}_z$                 | >99                       | 81                     | 10                     | 0                      | 0                      | 2                      |
| 3 <sup>c</sup> | $\text{Ru}_{0.04}\text{CeO}_z$                 | 97                        | 5                      | 16                     | 0                      | 0                      | 2                      |
| 4 <sup>d</sup> | $\text{CeO}_z$                                 | 97                        | 2                      | 18                     | 0                      | 1                      | 0                      |
| 5              | None                                           | >99                       | 1                      | 19                     | 0                      | 0                      | 0                      |

Reaction conditions: **2c** (1.96 mmol), toluene (1.0 mL), dodecane (0.07 mL),  $\text{NH}_3$  (0.32 MPa),  $\text{O}_2$  (1.0 MPa), 423 K, 24 h. Mass balance was over 0.9 except for entries 3, 4, and 5. <sup>a</sup> $\text{Cu}_{0.18}\text{Ru}_{0.05}\text{CeO}_z$  (74 mg),  $\text{Ru}/\text{Cu}/\mathbf{2c}/\text{NH}_3/\text{dodecane} = 1/3.5/100/191/100$ . <sup>b</sup> $\text{Cu}_{0.18}\text{CeO}_z$  (77 mg),  $\text{Cu}/\mathbf{2c}/\text{NH}_3/\text{dodecane} = 1/29/58/29$ . <sup>c</sup> $\text{Ru}_{0.04}\text{CeO}_z$  (72 mg),  $\text{Ru}/\mathbf{2c}/\text{NH}_3/\text{dodecane} = 1/100/191/100$ . <sup>d</sup> $\text{CeO}_z$  (74 mg),  $\mathbf{2c}/\text{NH}_3/\text{dodecane} = 1/1.91/1$ .

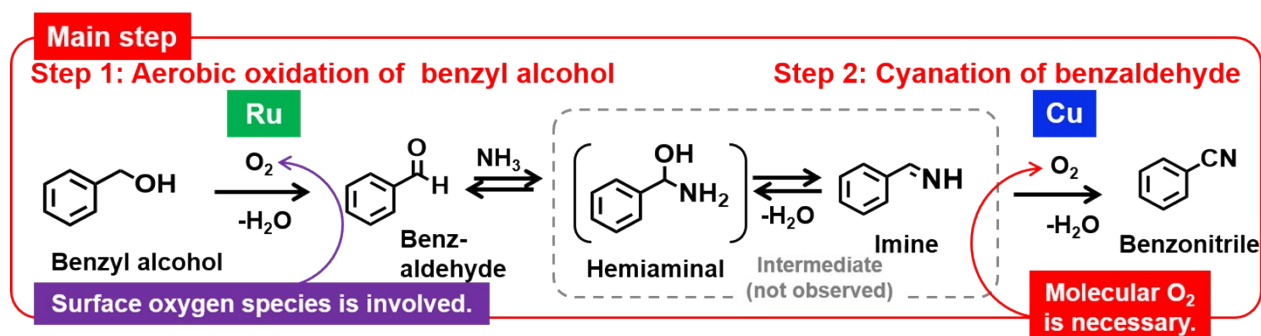

**Scheme S1.** Ammoxidation of benzyl alcohol and the roles of Cu and Ru species in each reaction step.

## General setup for the experiments

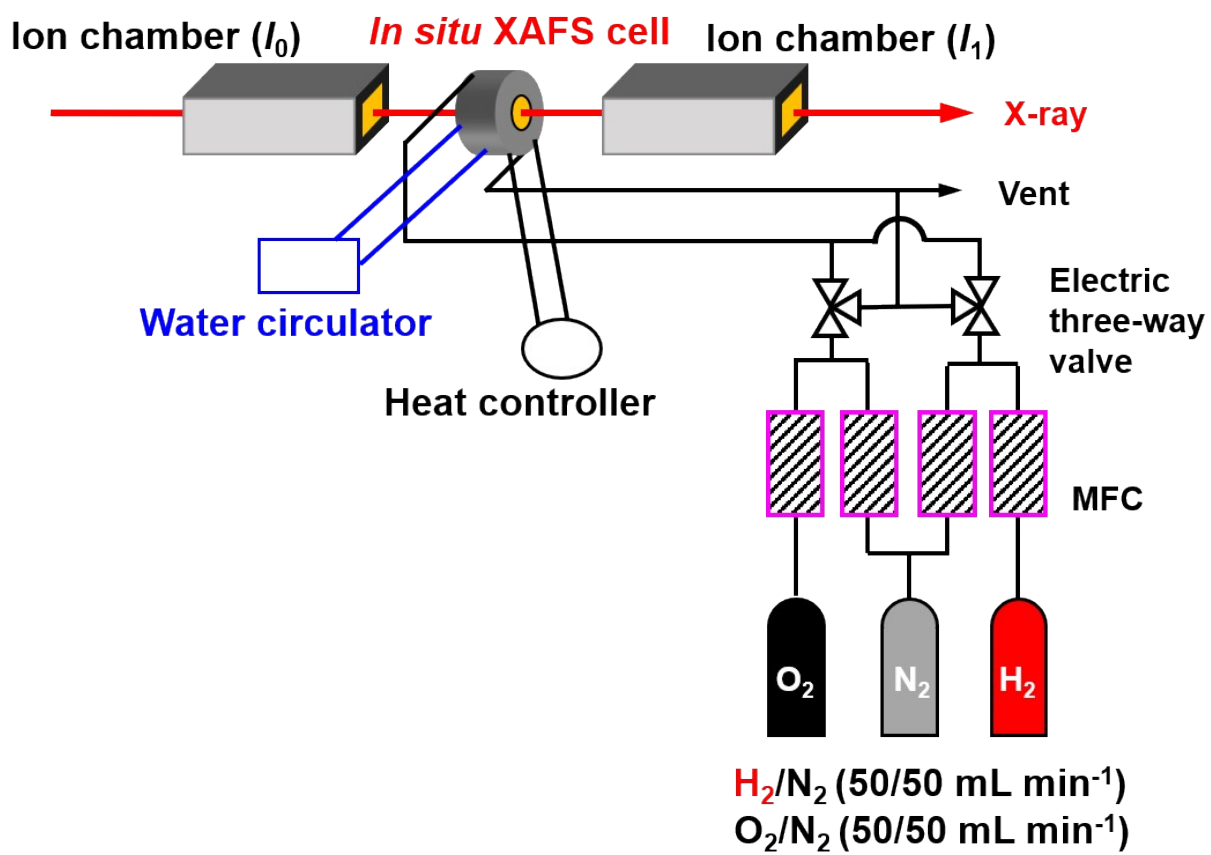

**Fig. S17.** Setup for *in situ* QXAFS measurements for  $H_2$  reduction and  $O_2$  oxidation.

## References:

- (1) D. R. Mullins, *Surf. Sci. Rep.*, 2015, **70**, 42–85.
- (2) G. Yan, Y. Tang, Y. Li, L. Nguyen, T. Sakata, K. Higashi, F. F. Tao and P. Sautet, *Nat. Catal.* 2022, **5**, 119–127.
- (3) S. Ikemoto, X. Huang, S. Muratsugu, S. Nagase, T. Koitaya, H. Matsui, G. Yokota, T. Sudoh, A. Hashimoto, Y. Tan, S. Yamamoto, J. Tang, I. Matsuda, J. Yoshinobu, T. Yokoyama, S. Kusaka, R. Matsuda and M. Tada, *Phys. Chem. Chem. Phys.*, 2019, **21**, 20868–20877.
- (4) Z. Li, K. Werner, K. Qian, R. You, A. Płucienik, A. Jia, L. Wu, L. Zhang, H. Pan, H. Kuhlenbeck, S. Shaikhutdinov, W. Huang and H. J. Freund, *Angew. Chem., Int. Ed.*, 2019, **58**, 14686–14693.
- (5) C. Yang, X. Yu, S. Heißler, A. Nefedov, S. Colussi, J. Llorca, A. Trovarelli, Y. Wang and C. Wöll, *Angew. Chem., Int. Ed.*, 2017, **56**, 375–379.
